# Supplementary material
Source: PubMed Central journal article supplement (PMC4609000)
Supplement: NIHMS722976-supplement-Supporting_Information.pdf [file NIHMS722976-supplement-Supporting_Information.pdf]

## SUPPORTING INFORMATION

### Table of Contents

|                                                                                                                                     | <u>Page</u> |
|-------------------------------------------------------------------------------------------------------------------------------------|-------------|
| <b>Figure S1.</b> Dose-dependent inhibition of DXP synthase by oxime mixtures containing 2,4,5- and 3,4,5-trihydroxy scaffolds..... | S2          |
| <b>Figure S2.</b> Determination of optimal linker length for 2,4,5-trihydroxybenzaloximes.....                                      | S3          |
| <b>Figure S3.</b> Inhibition of DXP synthase by mixed oxime <b>4</b> .....                                                          | S3          |
| <b>Figure S4.</b> Inhibition of DXP synthase by symmetrical oxime <b>5</b> .....                                                    | S4          |
| <b>Figure S5-S7.</b> Inhibition of DXP synthase by 2,4,5-trihydroxybenzaloximes <b>7-9</b> .....                                    | S4-S5       |
| <b>Figure S8.</b> Inhibition of DXP synthase by methyloximes <b>12-24</b> .....                                                     | S6          |
| <b>Figure S9.</b> Inhibition modes against DXP synthase by oximes <b>17, 21</b> and <b>22</b> .....                                 | S7          |
| <b>Figure S10.</b> <sup>13</sup> C NMR of oxime <b>8</b> in the presence and absence of BME.....                                    | S8          |
| <b>Figures S11-S30.</b> <sup>1</sup> H NMR spectra for <b>4, 5, 7-24</b> .....                                                      | S9-S18      |

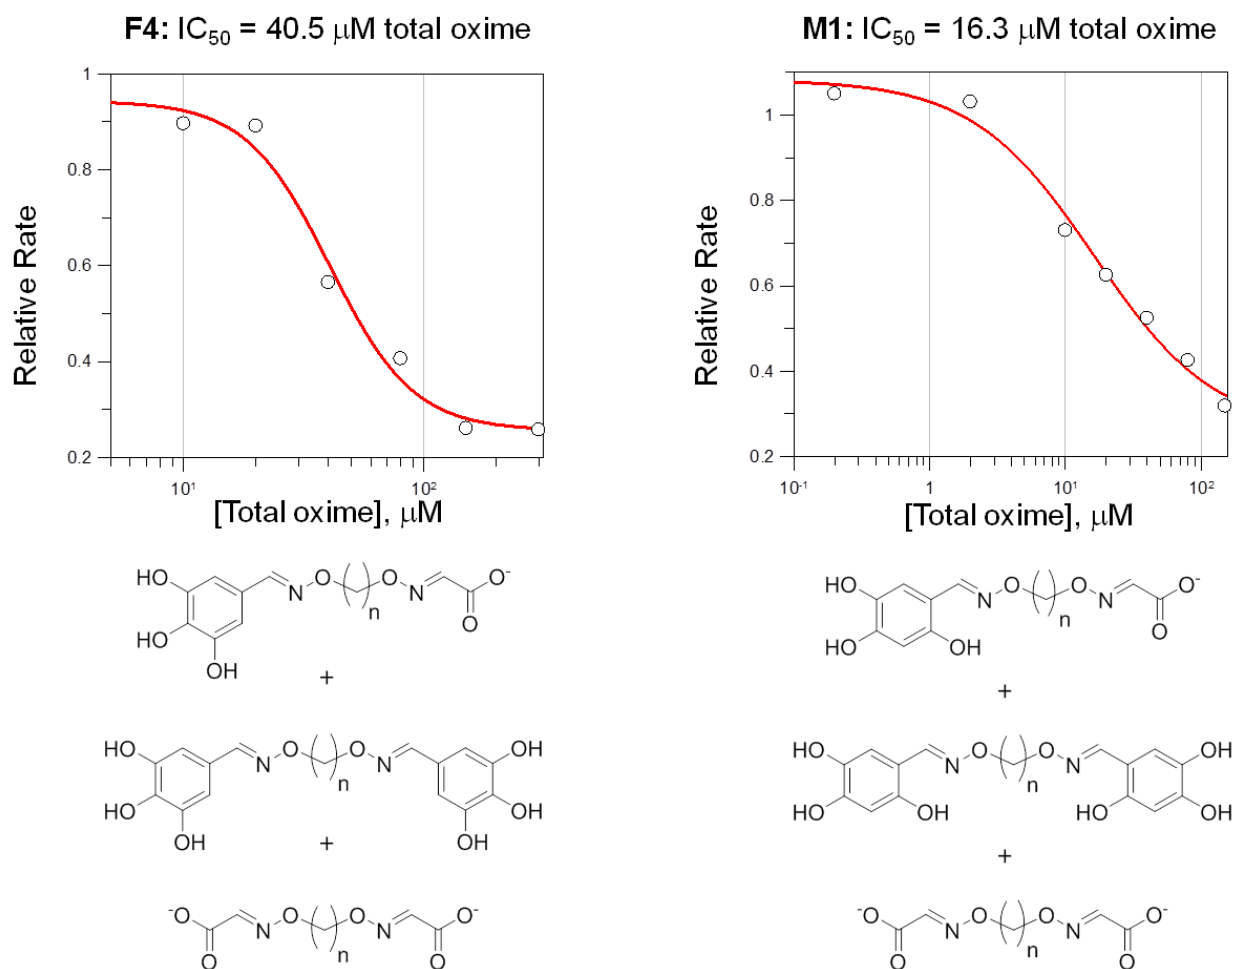

**Figure S1.** Dose-dependent inhibition of DXP synthase by oxime mixtures containing 2,4,5- and 3,4,5-trihydroxy scaffolds. The activity of each mixture was determined using the IspC-coupled assay described elsewhere.<sup>1</sup> Concentrations refer to the total concentration of dioxime products irrespective of oxime derivatization or length of the dialkoxyamine portion. Alkoxyamine linkers with 2–5 methylenes were used.

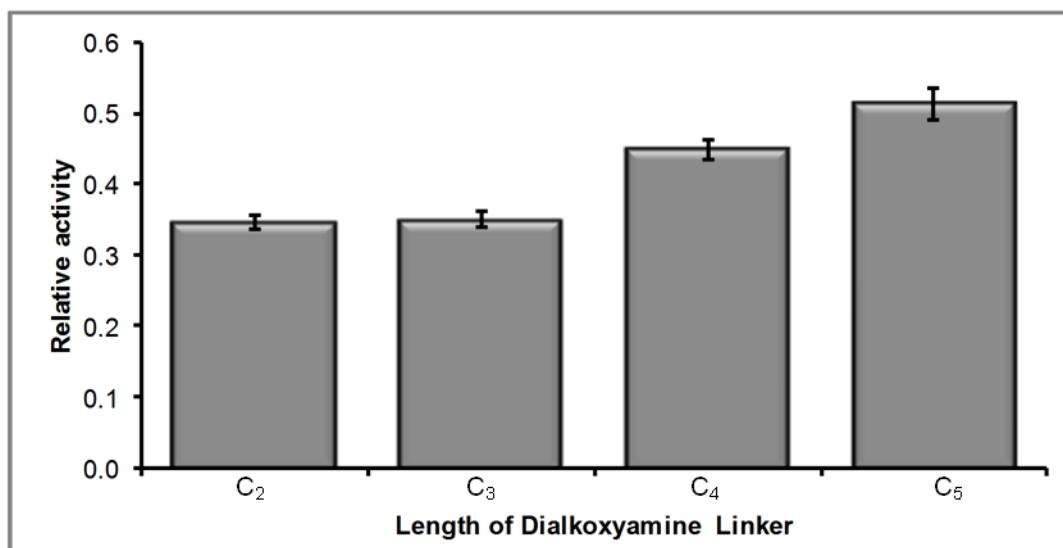

**Figure S2.** Determination of optimal linker length for 2,4,5-trihydroxybenzaloximes. Symmetrical oximes with varied dialkoxyamine linkers were synthesized by incubation the desired dialkoxyamine with 2 molar equivalents of 2,4,5-trihydroxybenzaldehyde overnight in DMSO. The resulting symmetrical oximes were tested directly for inhibition without purification.

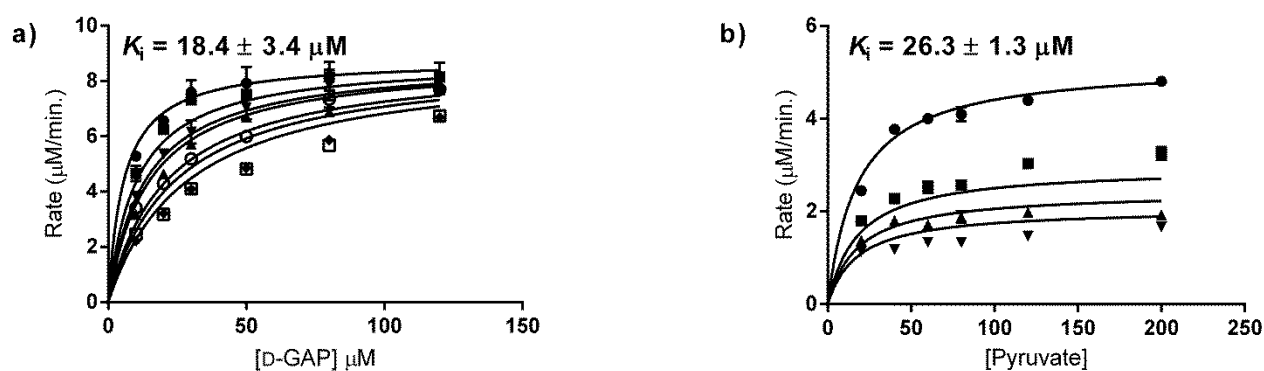

**Figure S3.** Inhibition of DXP synthase by mixed oxime 4. a) Oxime 4 displays competitive inhibition against D-GAP as determined by model discrimination analysis (GraphPad Prism). Inhibitor concentrations: • 0 μM, ■ 15 μM, ▲ 25 μM, ▼ 30 μM, ◆ 50 μM, ○ 60 μM, □ 75 μM. b) Oxime 4 displays noncompetitive inhibition against pyruvate as determined by model discrimination analysis (GraphPad Prism). Inhibitor concentrations: • 0 μM, ■ 20 μM, ▲ 30 μM, ▼ 40 μM.

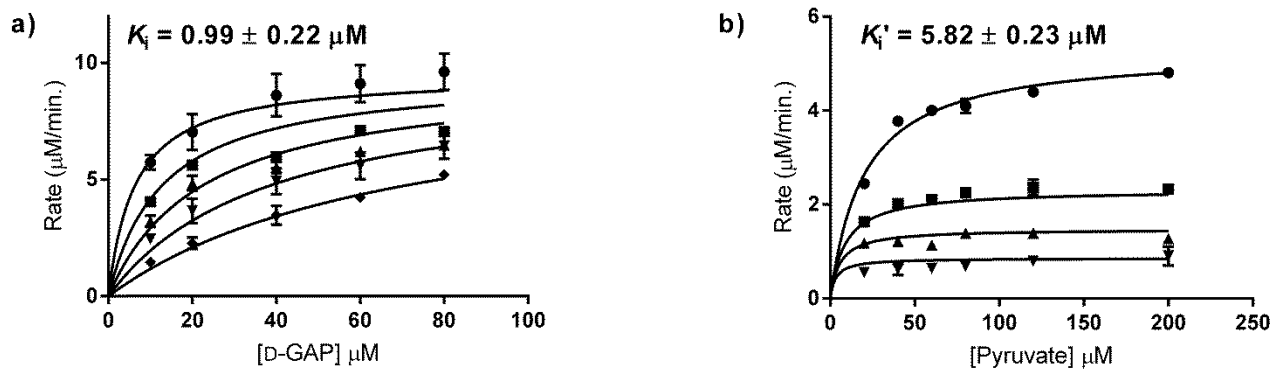

**Figure S4.** Inhibition of DXP synthase by symmetrical oxime **5**. a) Oxime **5** displays competitive inhibition against D-GAP as determined by model discrimination analysis (GraphPad Prism) Inhibitor concentrations:  $\bullet$  0  $\mu\text{M}$ ,  $\blacksquare$  1.0  $\mu\text{M}$ ,  $\blacktriangle$  2.5  $\mu\text{M}$ ,  $\blacktriangledown$  5.0  $\mu\text{M}$ ,  $\blacklozenge$  10  $\mu\text{M}$ . b) Oxime **5** displays uncompetitive inhibition against pyruvate as determined by model discrimination analysis (GraphPad Prism) Inhibitor concentrations:  $\bullet$  0  $\mu\text{M}$ ,  $\blacksquare$  7.5  $\mu\text{M}$ ,  $\blacktriangle$  15  $\mu\text{M}$ ,  $\blacktriangledown$  30  $\mu\text{M}$

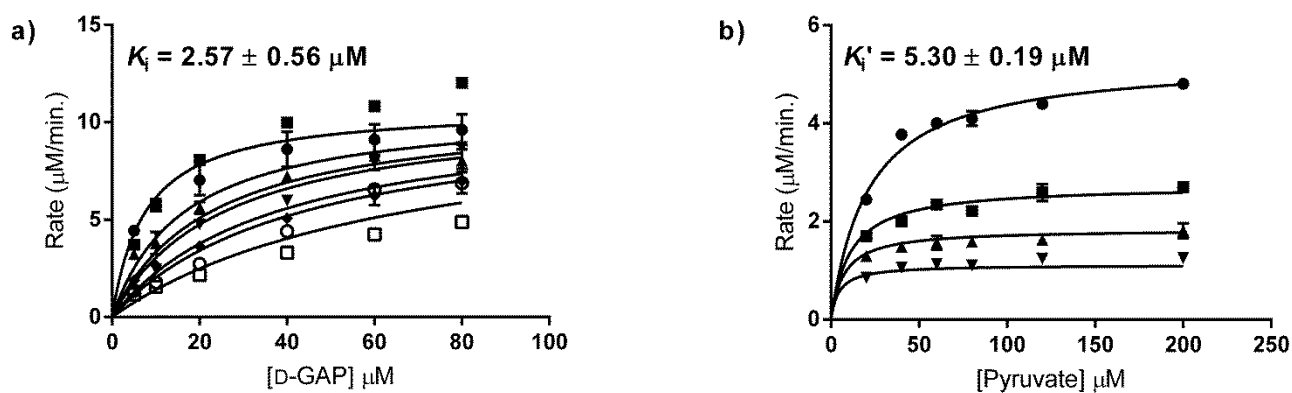

**Figure S5.** Inhibition of DXP synthase by 2,4,5-trihydroxybenzaloximes **7**. a) Oxime **7** displays competitive inhibition against D-GAP as determined by model discrimination analysis (GraphPad Prism). Inhibitor concentrations:  $\bullet$  0  $\mu\text{M}$ ,  $\blacksquare$  3  $\mu\text{M}$ ,  $\blacktriangle$  5  $\mu\text{M}$ ,  $\blacktriangledown$  6  $\mu\text{M}$ ,  $\blacklozenge$  10  $\mu\text{M}$ ,  $\circ$  12  $\mu\text{M}$ ,  $\square$  20  $\mu\text{M}$ . b) Oxime **7** displays uncompetitive inhibition against pyruvate as determined by model discrimination analysis (GraphPad Prism). Inhibitor concentrations:  $\bullet$  0  $\mu\text{M}$ ,  $\blacksquare$  5  $\mu\text{M}$ ,  $\blacktriangle$  10  $\mu\text{M}$ ,  $\blacktriangledown$  20  $\mu\text{M}$ .

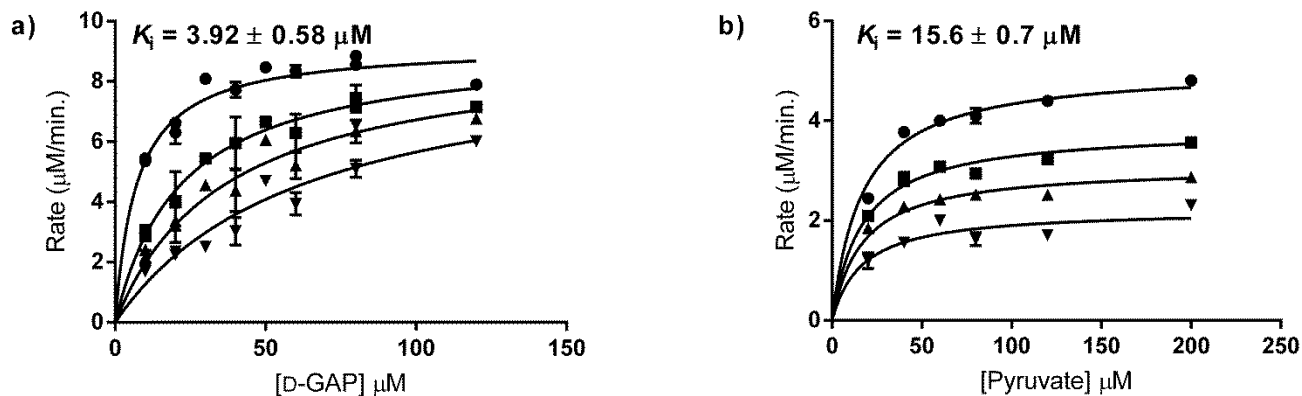

**Figure S6.** Inhibition of DXP synthase by 2,4,5-trihydroxybenzaloxime **8**. a) Oxime **8** displays competitive inhibition against D-GAP as determined by model discrimination analysis (GraphPad Prism). Inhibitor concentrations: • 0  $\mu\text{M}$ , ■ 8  $\mu\text{M}$ , ▲ 16  $\mu\text{M}$ , ▼ 30  $\mu\text{M}$ . b) Oxime **8** displays noncompetitive inhibition against pyruvate as determined by model discrimination analysis (GraphPad Prism). Inhibitor concentrations: • 0  $\mu\text{M}$ , ■ 5  $\mu\text{M}$ , ▲ 10  $\mu\text{M}$ , ▼ 20  $\mu\text{M}$ .

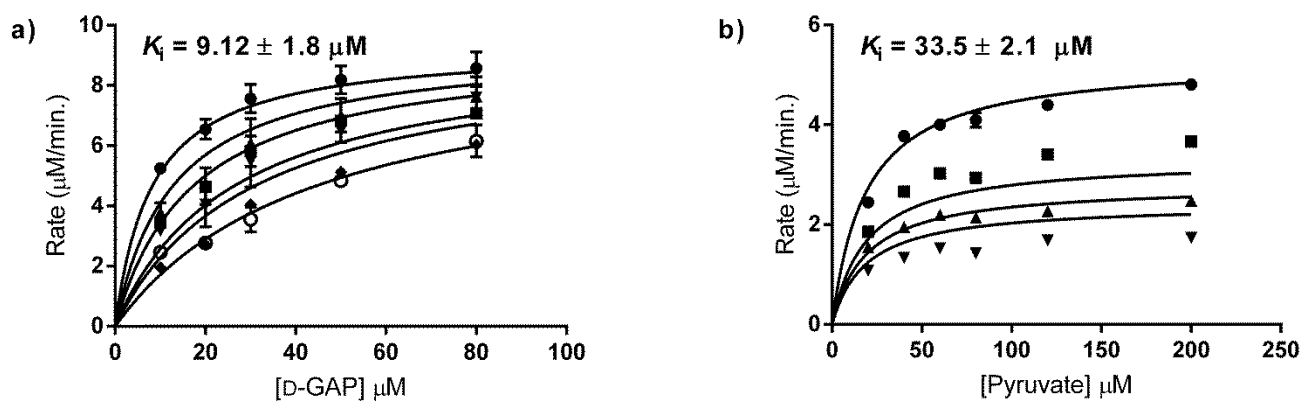

**Figure S7.** Inhibition of DXP synthase by 2,4,5-trihydroxybenzaloxime **9**. a) Oxime **9** displays competitive inhibition against D-GAP as determined by model discrimination analysis (GraphPad Prism). Inhibitor concentrations: • 0  $\mu\text{M}$ , ■ 5  $\mu\text{M}$ , ▲ 10  $\mu\text{M}$ , ▼ 20  $\mu\text{M}$ , ◆ 25  $\mu\text{M}$ , ○ 40  $\mu\text{M}$ . b) Oxime **9** displays noncompetitive inhibition against pyruvate as determined by model discrimination analysis (GraphPad Prism). Inhibitor concentrations: • 0  $\mu\text{M}$ , ■ 20  $\mu\text{M}$ , ▲ 30  $\mu\text{M}$ , ▼ 40  $\mu\text{M}$ .

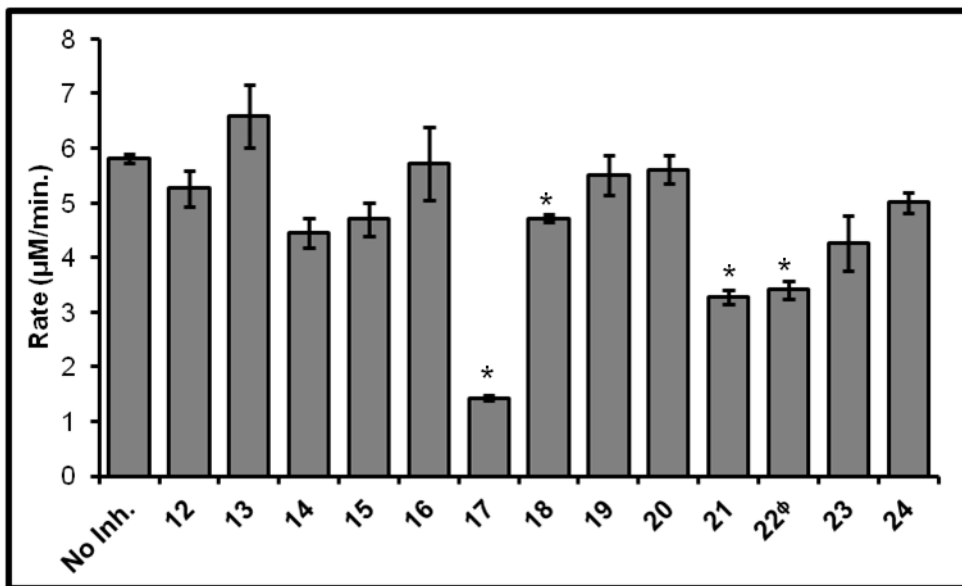

**Figure S8.** Inhibition of DXP synthase by methyloximes **12-24**. <sup>o</sup>Compound was tested at 100 µM. \*Significantly different from no inhibitor control (p < 0.05).

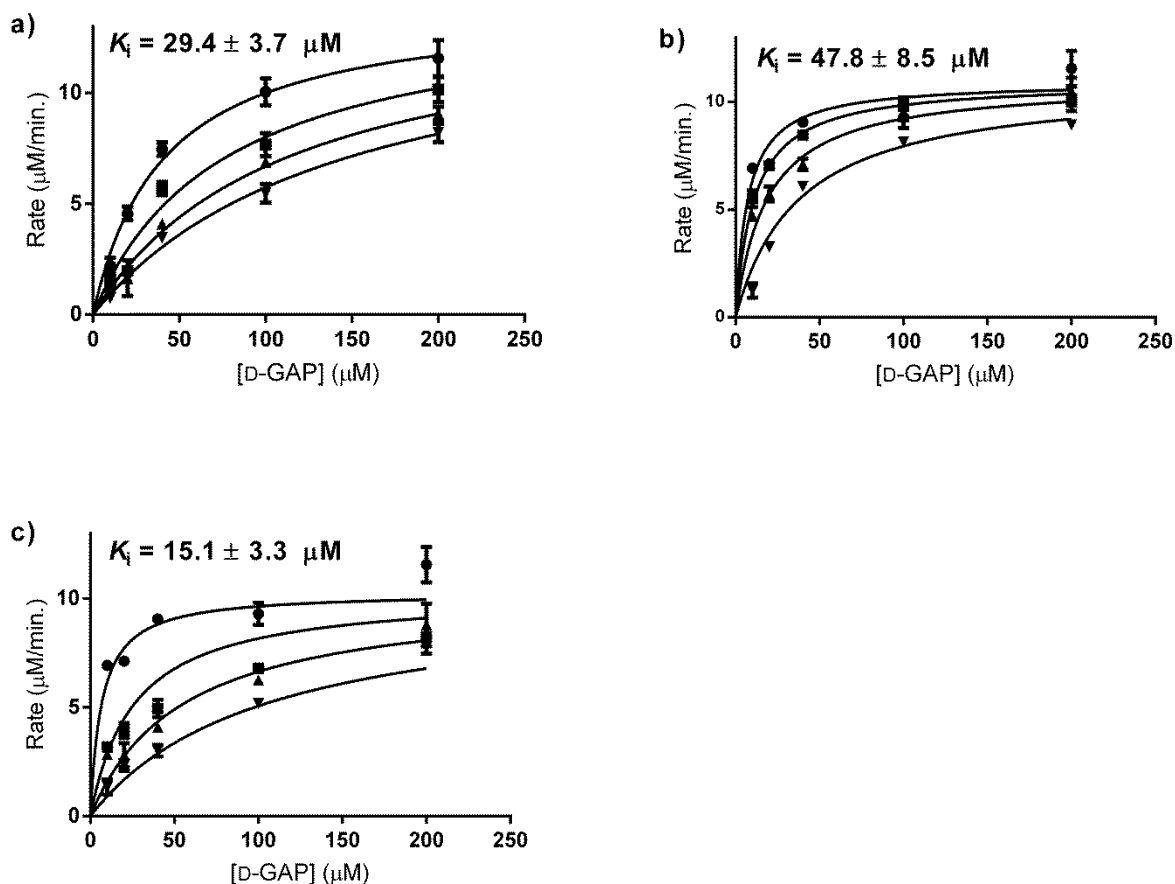

**Figure S9.** Inhibition of DXP synthase by oximes **17**, **21**, and **22**. Oximes **17**, **21**, and **22** all display competitive inhibition against D-GAP as determined by model discrimination analysis (GraphPad Prism). a) Inhibition by **17**. Inhibitor concentrations:  $\bullet$  0  $\mu\text{M}$ ,  $\blacksquare$  25  $\mu\text{M}$ ,  $\blacktriangle$  50  $\mu\text{M}$ ,  $\blacktriangledown$  75  $\mu\text{M}$ . b) Inhibition by **21**. Inhibitor concentrations:  $\bullet$  0  $\mu\text{M}$ ,  $\blacksquare$  25  $\mu\text{M}$ ,  $\blacktriangle$  75  $\mu\text{M}$ ,  $\blacktriangledown$  200  $\mu\text{M}$ . c) Inhibition by **22**. Inhibitor concentrations:  $\bullet$  0  $\mu\text{M}$ ,  $\blacksquare$  20  $\mu\text{M}$ ,  $\blacktriangle$  50  $\mu\text{M}$ ,  $\blacktriangledown$  100  $\mu\text{M}$ .

#### Experimental Procedure for $^{13}\text{C}$ NMR analysis.

**Analysis of Oxime 8 in aqueous solution.** Oxime **8** (0.0182 g, 0.0994 mmol, 1 eq.) was dissolved in DMSO- $d_6$  (0.050 mL) and diluted into phosphate buffer (500 mM, pH 8, 0.351 mL) then HEPES (1M, 0.099 mL, 1 eq.). An initial spectrum was collected then another spectrum was collected after 24 hours.

**Analysis of Oxime 8 in aqueous solution with  $\beta$ -mercaptoethanol (BME).** A solution of oxime **8** (124 mM, 1 eq.) in phosphate buffer (500 mM, pH 8, 10% (v/v) DMSO- $d_6$ ) was prepared and a  $^{13}\text{C}$  NMR spectrum was collected. BME (13.1  $\mu\text{L}$ , 0.187 mmol, 3 eq.) was added to the oxime solution and the resulting solution was analyzed by  $^{13}\text{C}$  NMR.

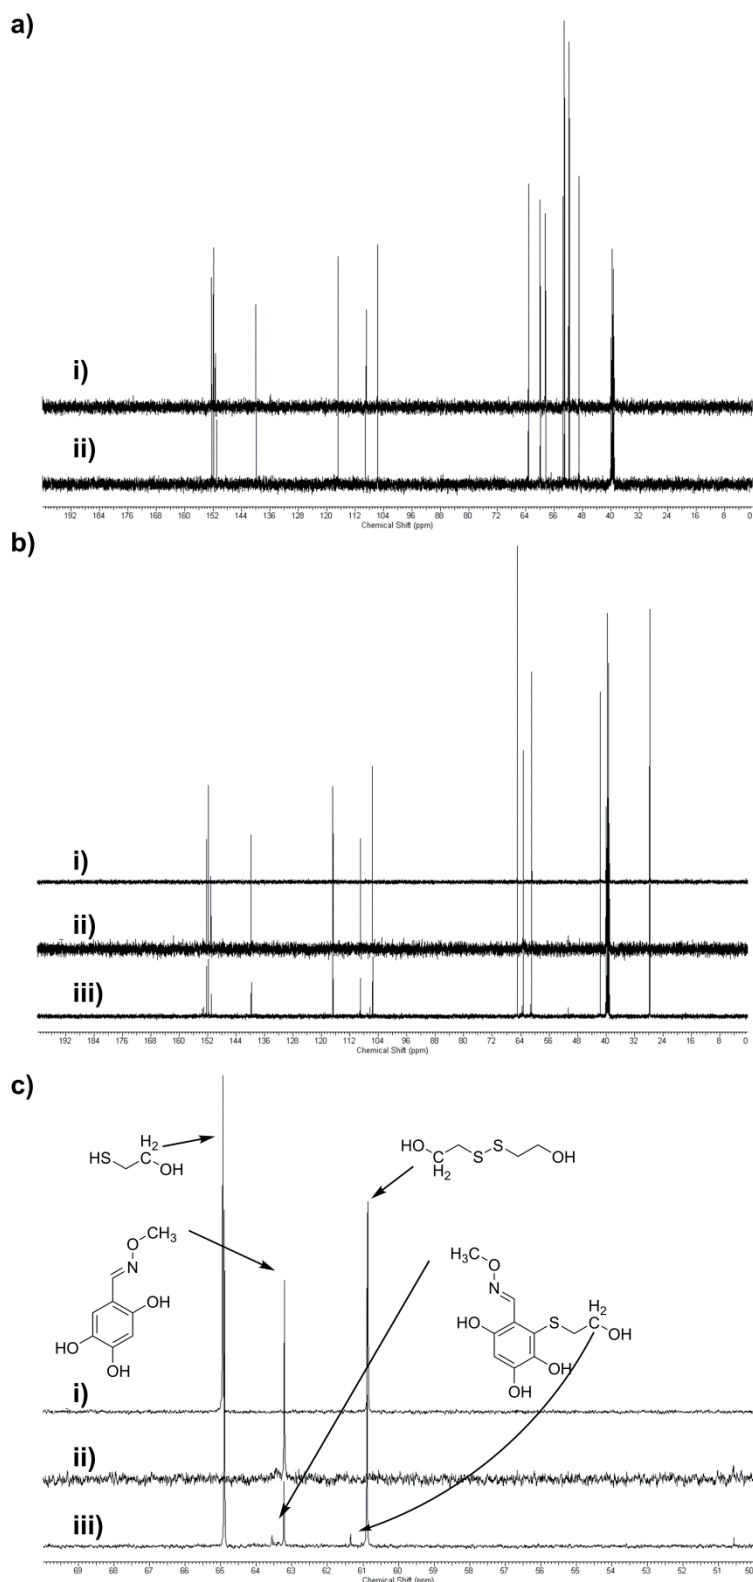



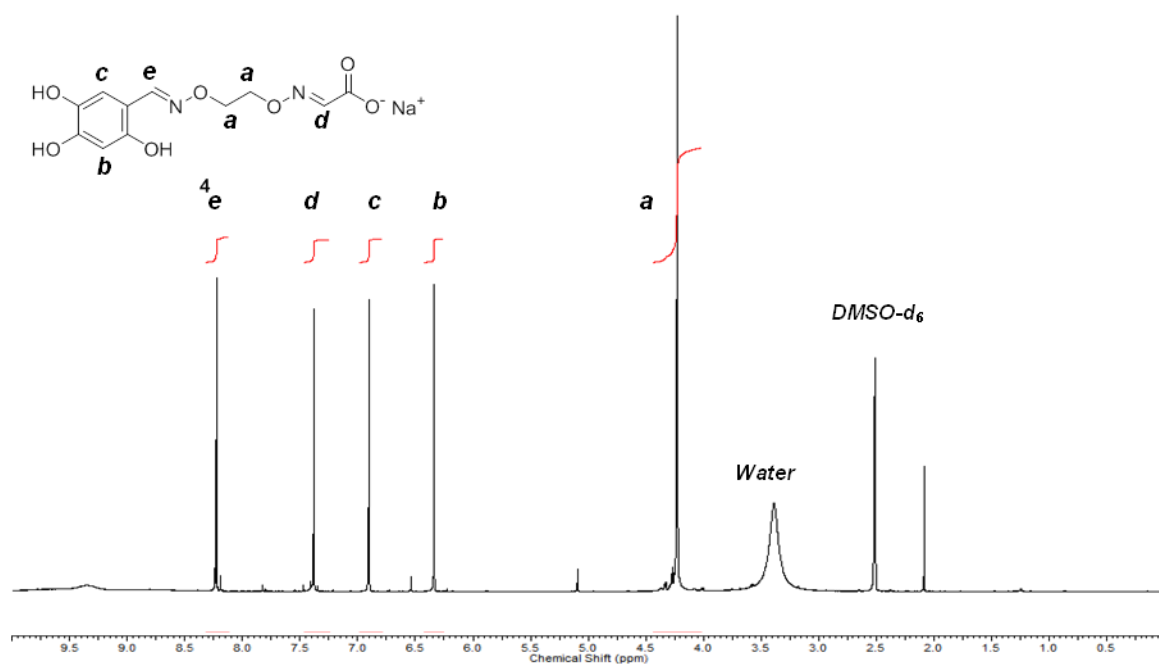

Figures S11. <sup>1</sup>H NMR spectra of **4**.

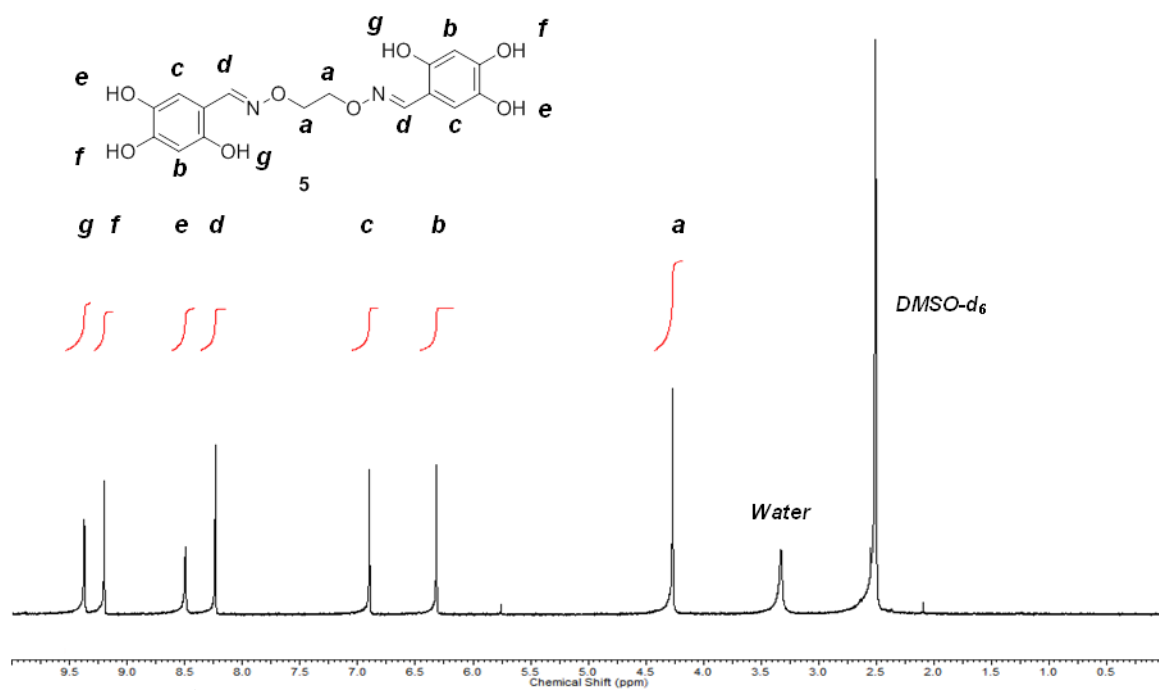

Figures S12. <sup>1</sup>H NMR spectra of **5**.

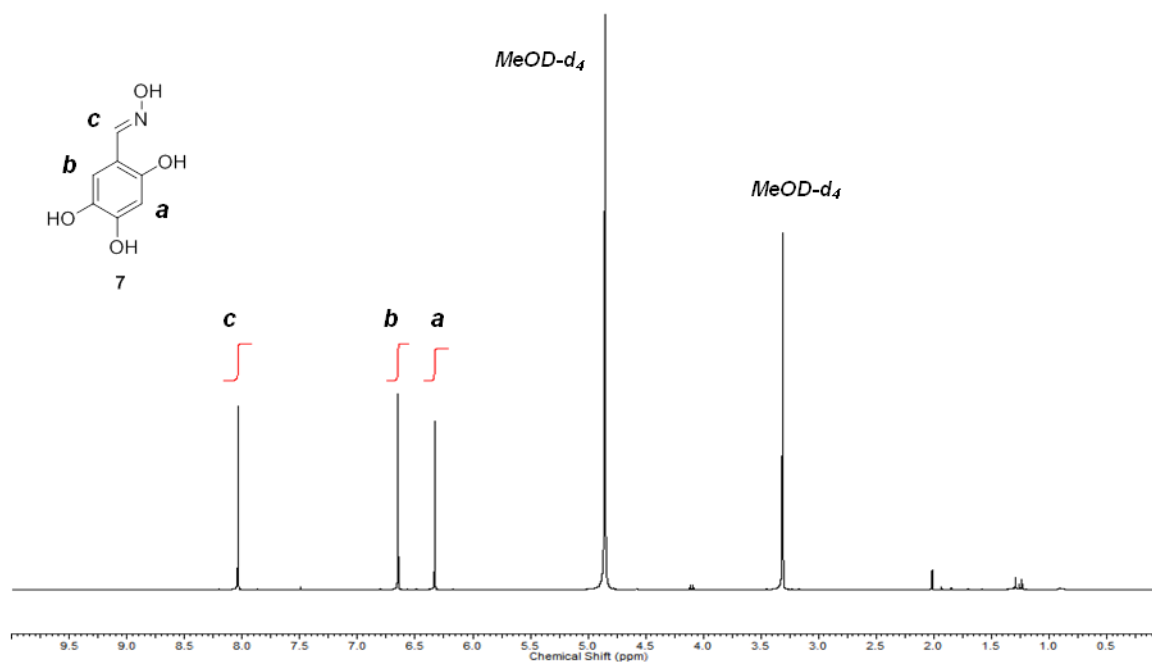

Figures S13. <sup>1</sup>H NMR spectra of **7**.

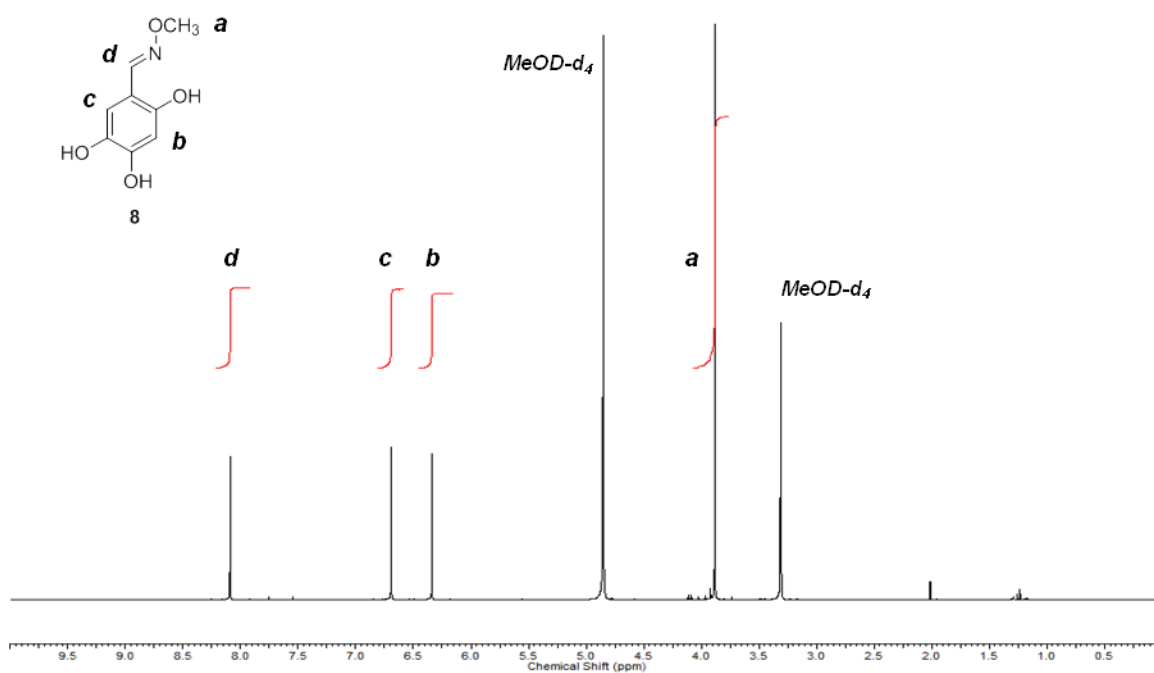

Figures S14. <sup>1</sup>H NMR spectra of **8**.

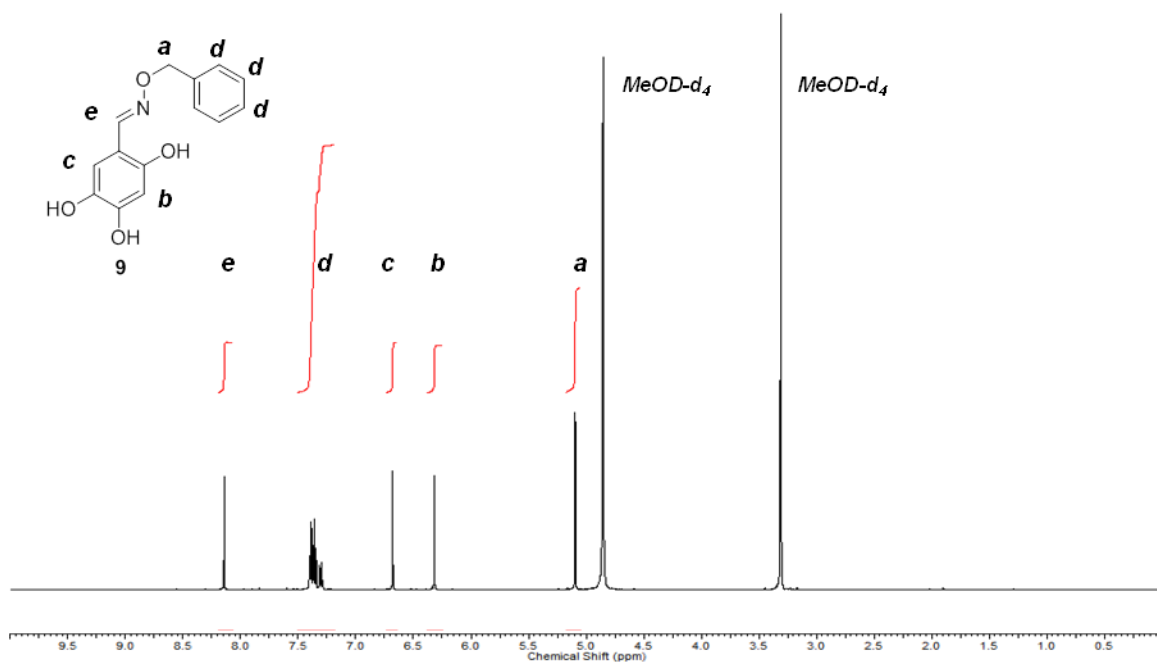

Figures S15. <sup>1</sup>H NMR spectra of **9**.

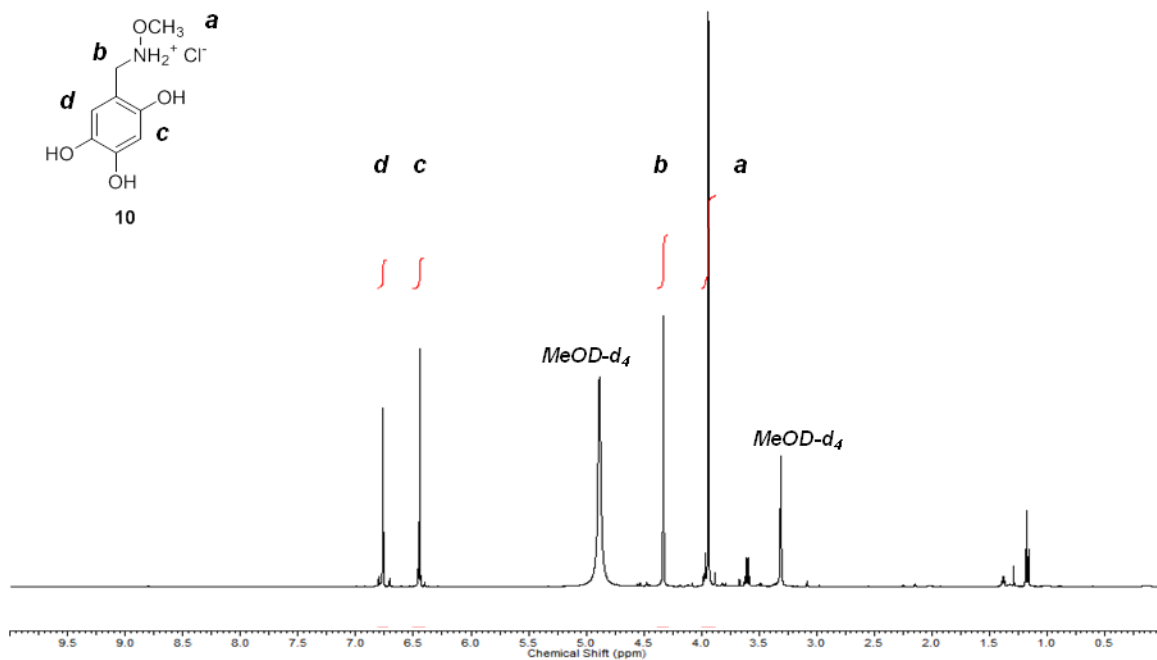

Figures S16. <sup>1</sup>H NMR spectra of **10**.

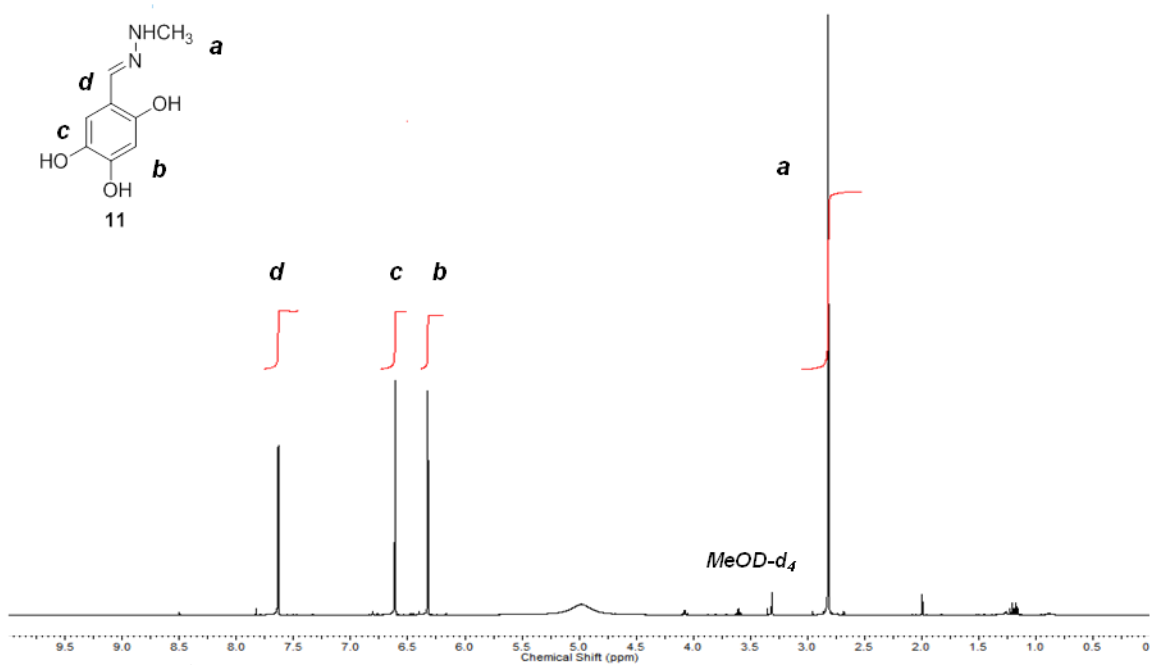

Figures S17. <sup>1</sup>H NMR spectra of 11.

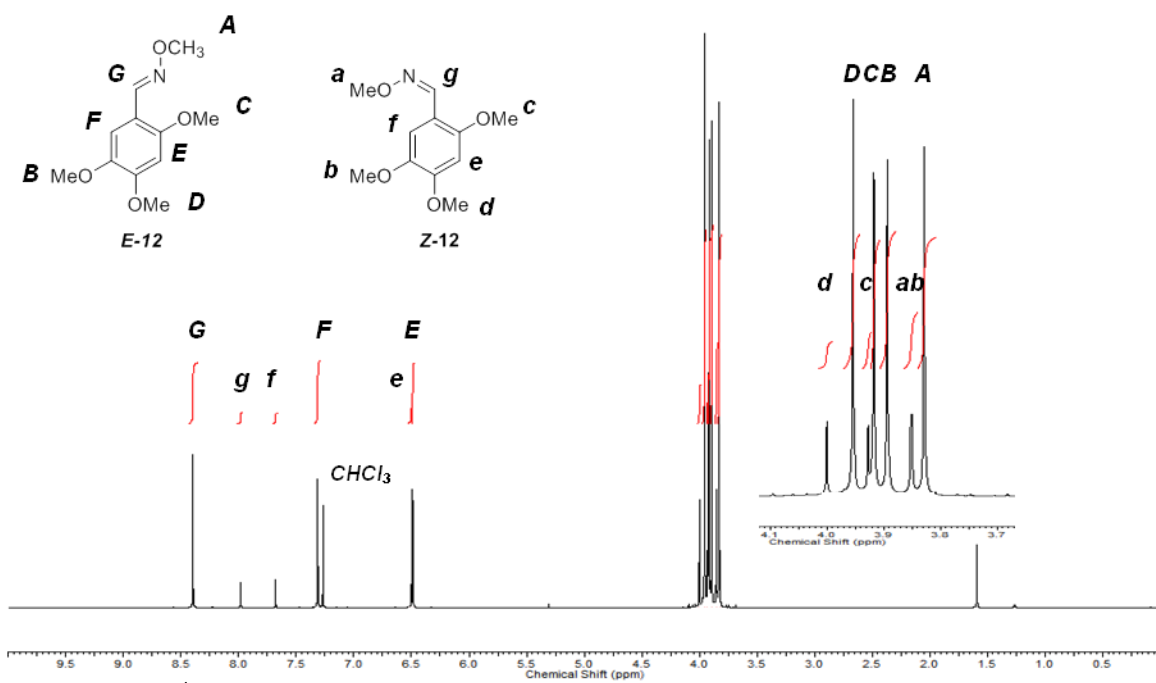

Figures S18. <sup>1</sup>H NMR spectra of 12.

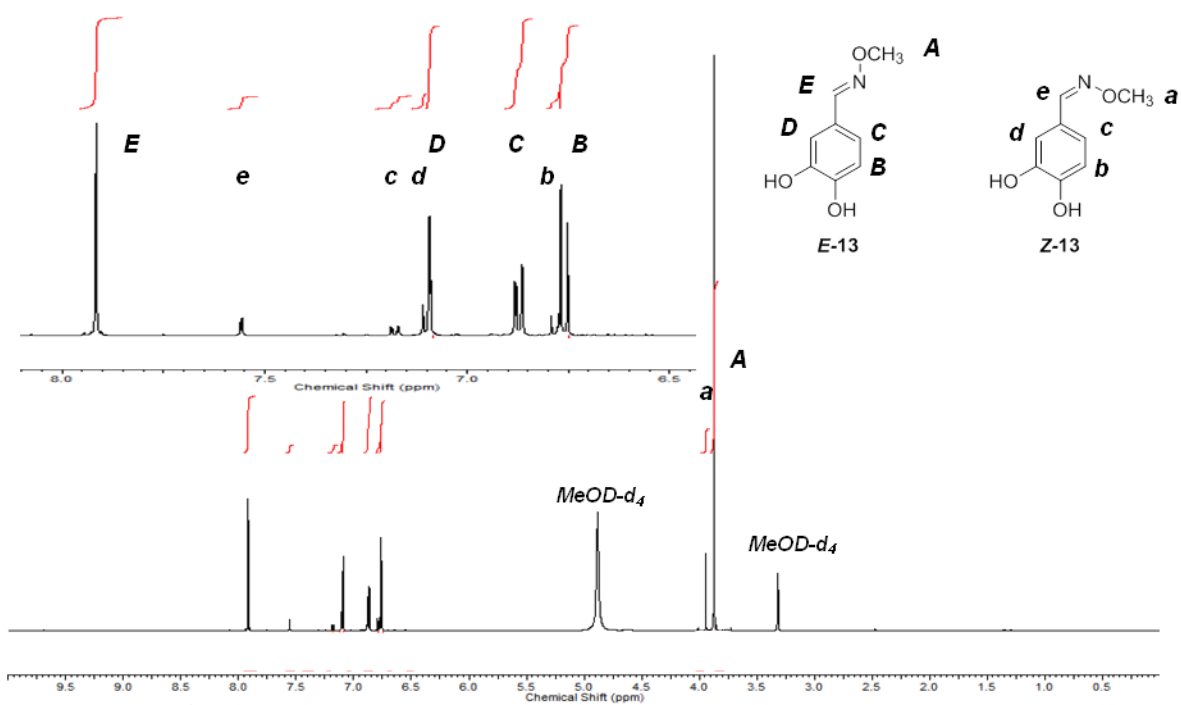

Figures S19. <sup>1</sup>H NMR spectra of 13.

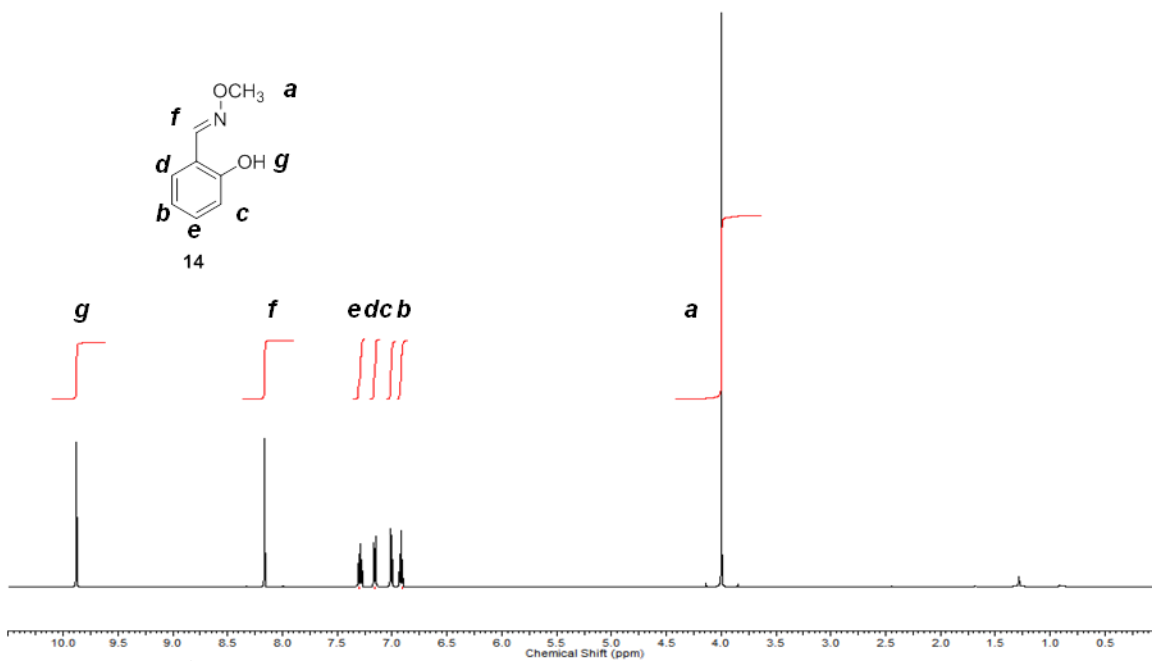

Figures S20. <sup>1</sup>H NMR spectra of 14.

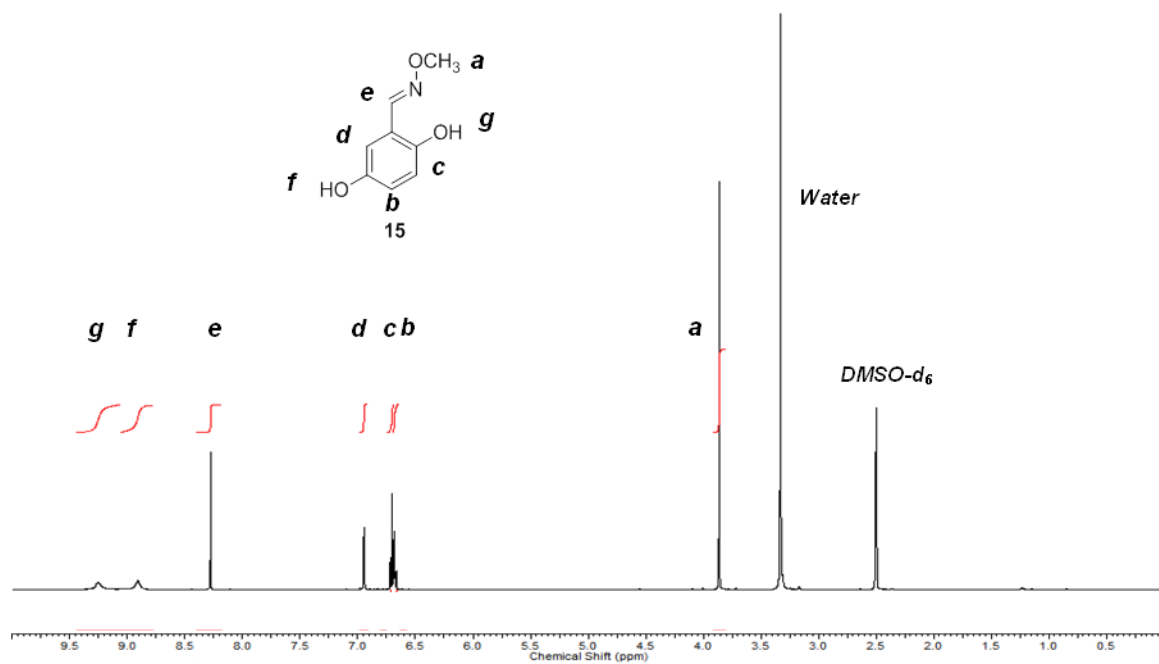

Figures S21. <sup>1</sup>H NMR spectra of **15**.

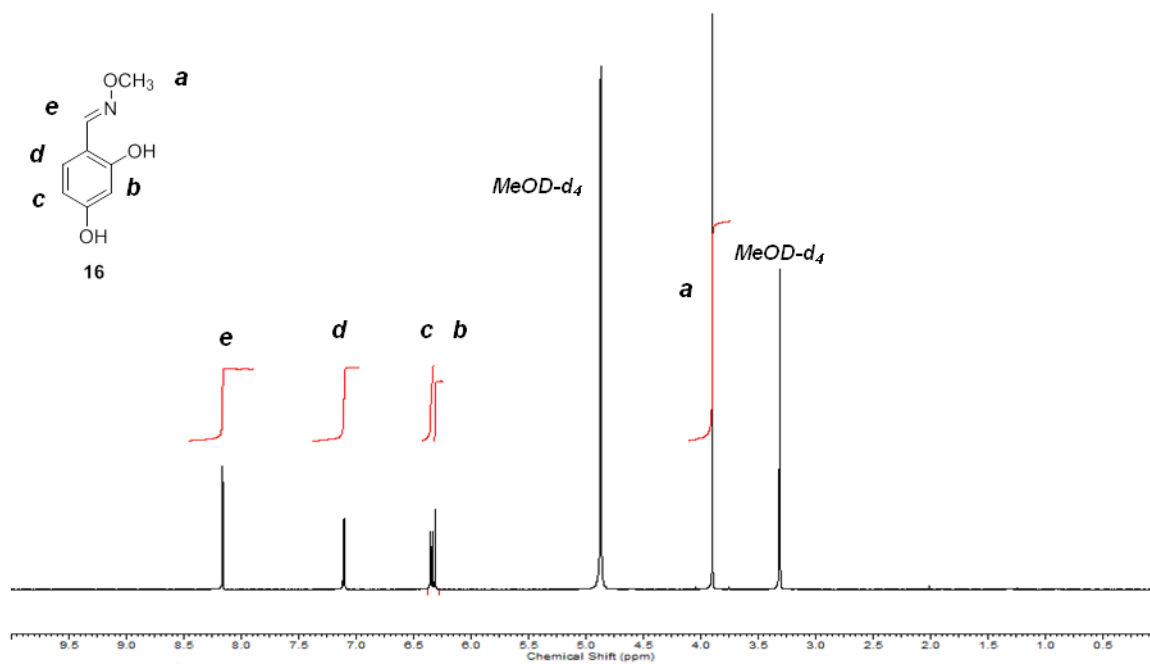

Figures S22. <sup>1</sup>H NMR spectra of **16**.

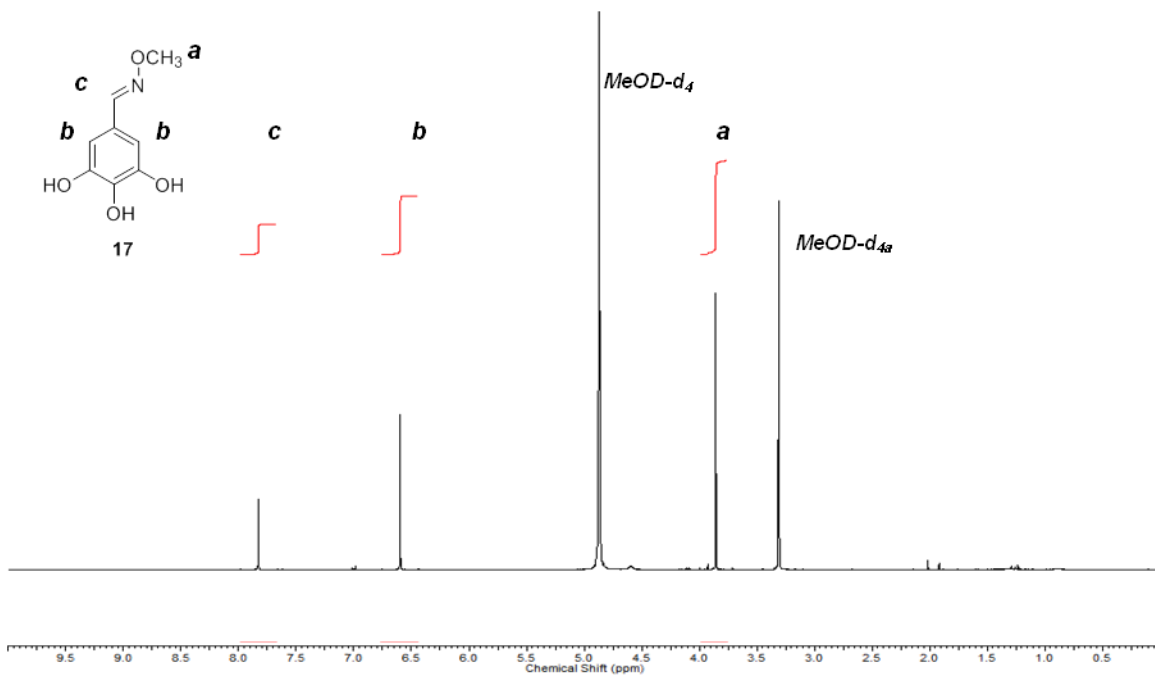

Figures S23. <sup>1</sup>H NMR spectra of 17.

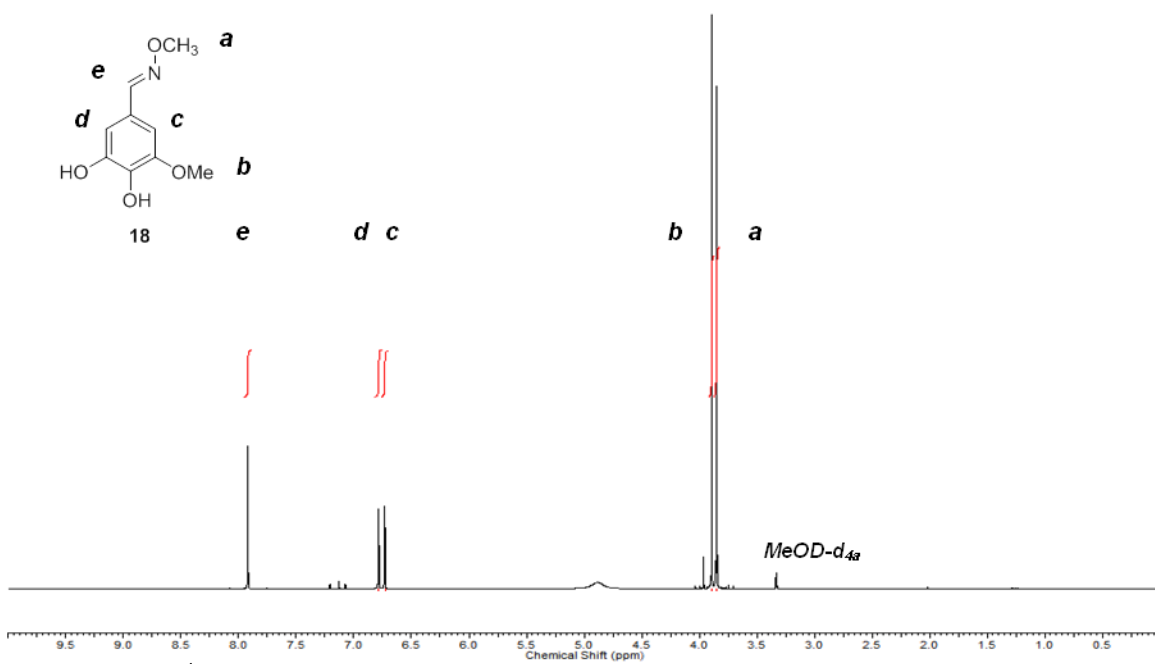

Figures S24. <sup>1</sup>H NMR spectra of 18.

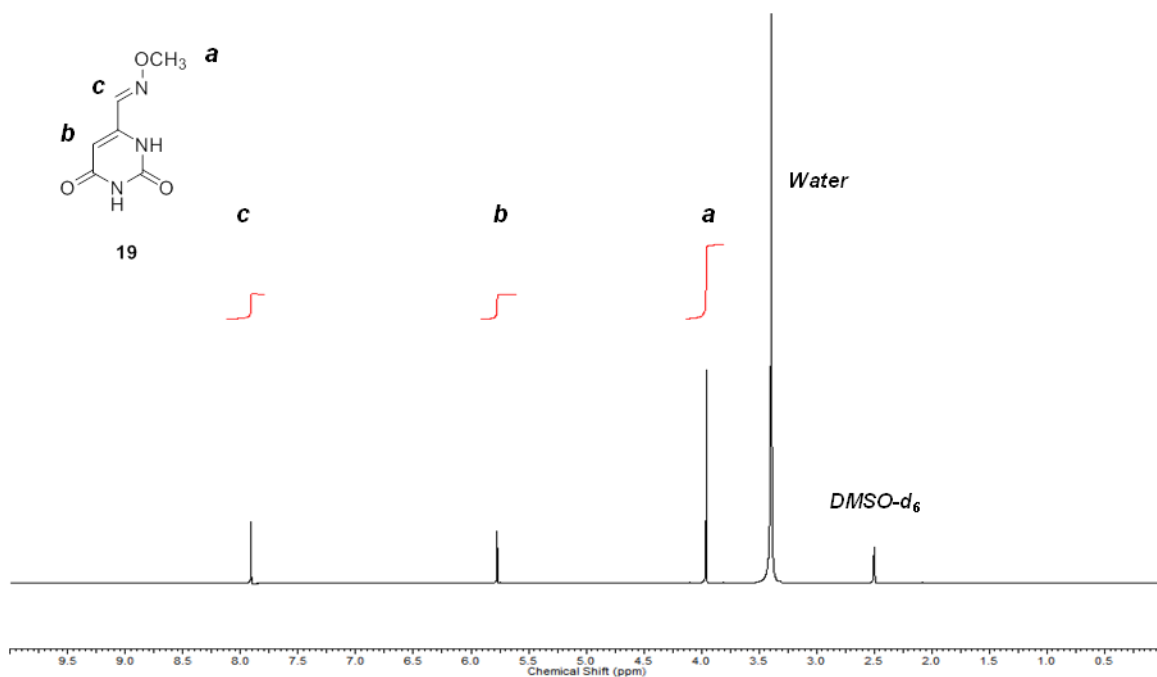

Figures S25. <sup>1</sup>H NMR spectra of **19**.

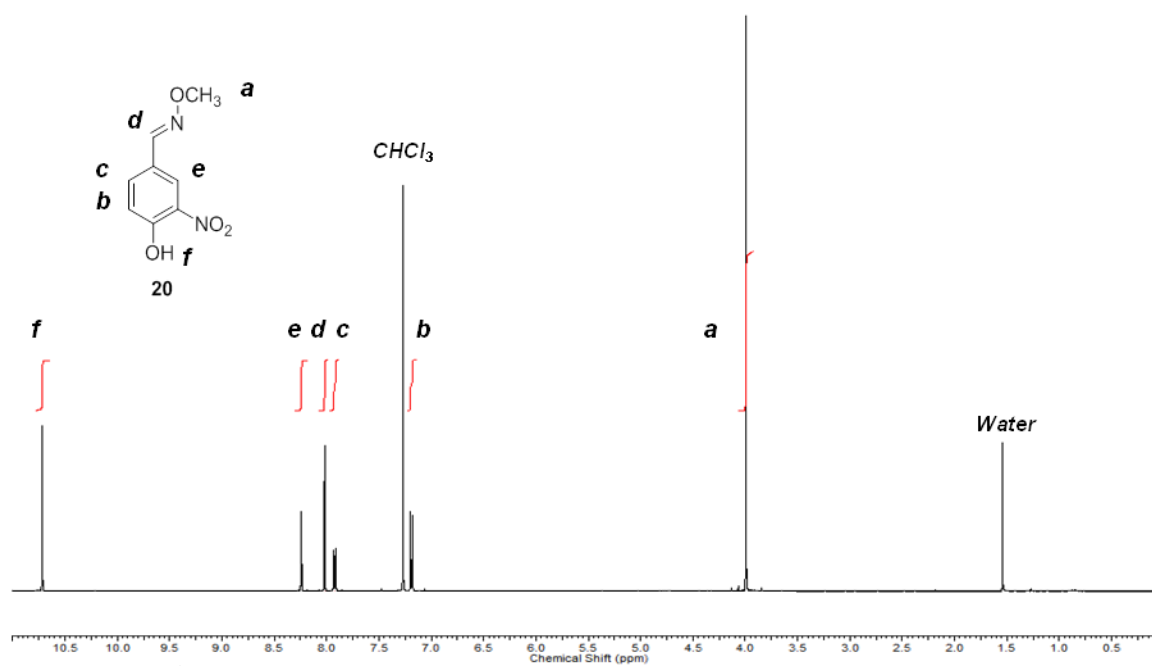

Figures S26. <sup>1</sup>H NMR spectra of **20**.



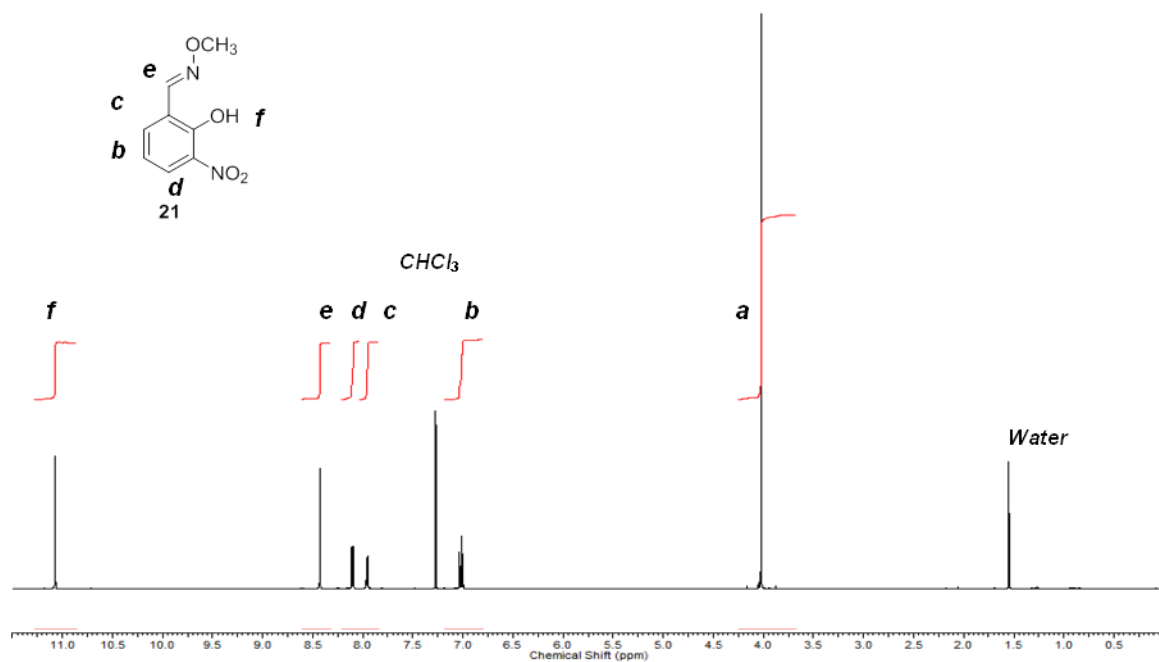

Figures S27. <sup>1</sup>H NMR spectra of **21**.

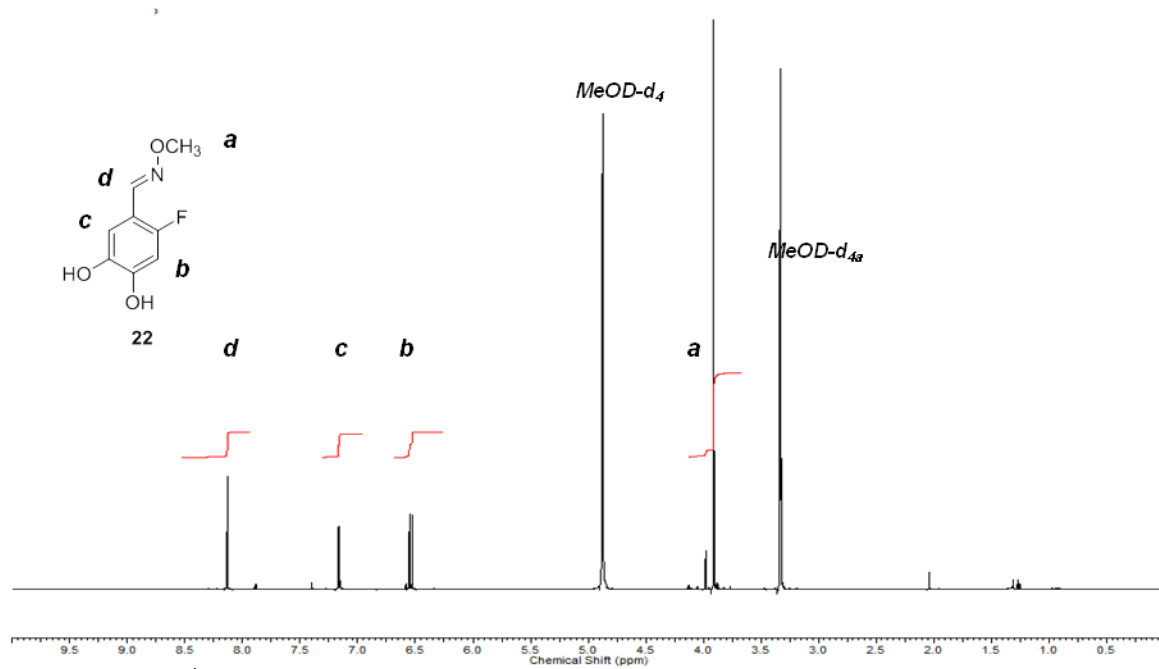

Figures S28. <sup>1</sup>H NMR spectra of **22**.

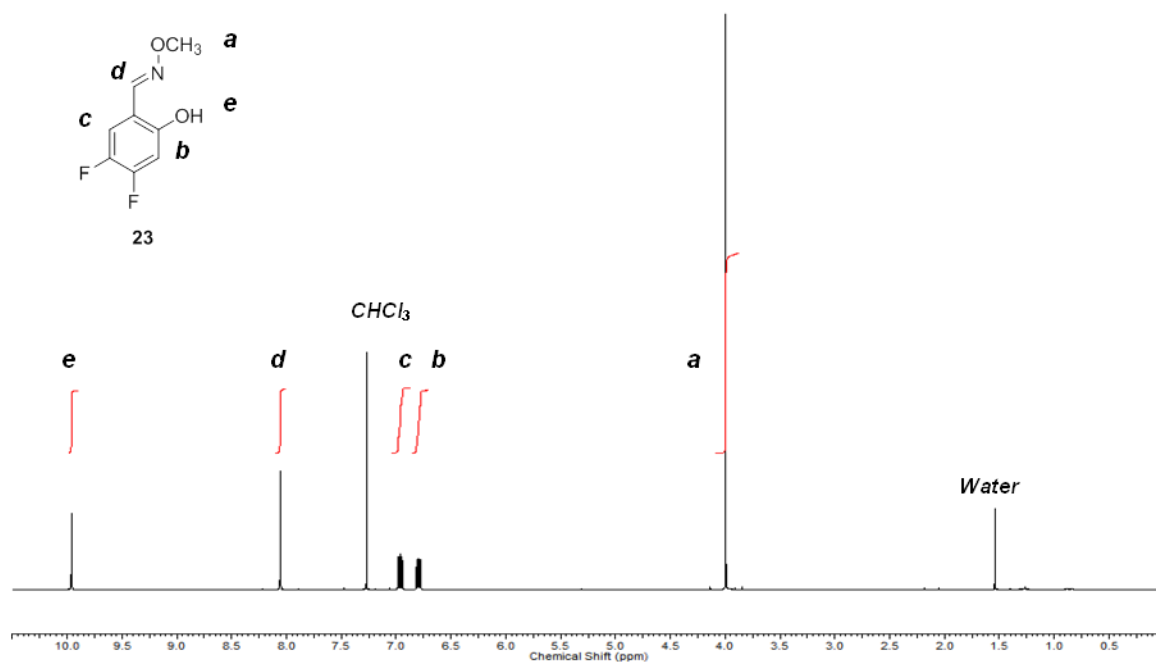

**Figures S29.**  $^1\text{H}$  NMR spectra of **23**.

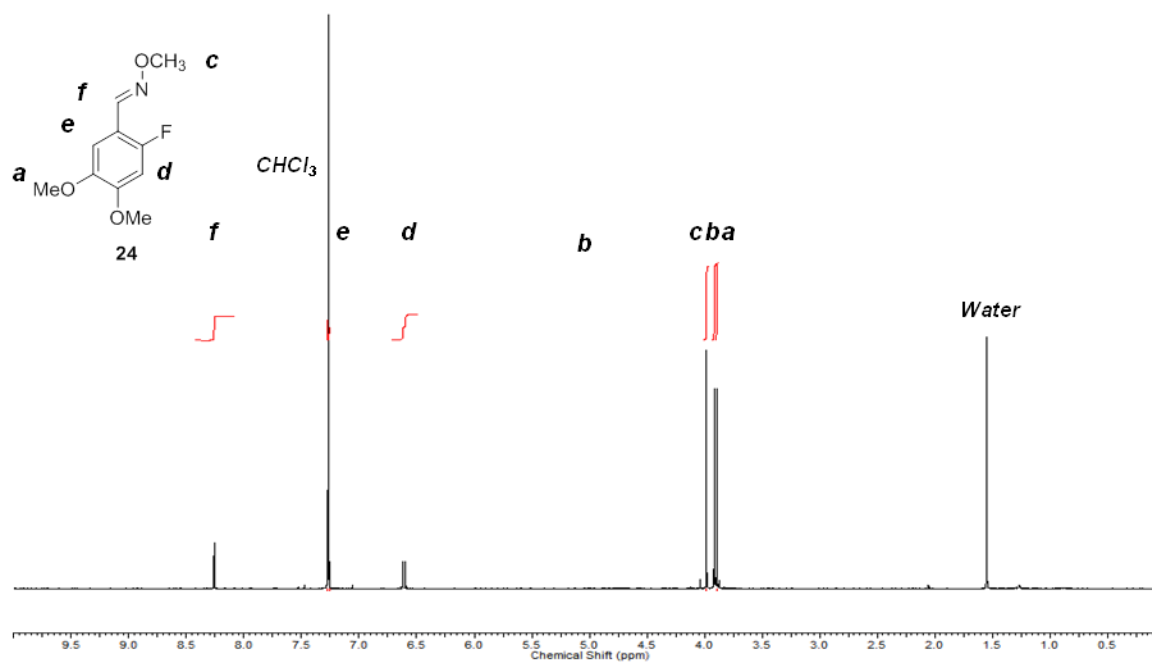

**Figures S30.**  $^1\text{H}$  NMR spectra of **24**.

Reference:

1. Brammer LA, Smith JM, Wade H, Meyers CF. 1-deoxy-D-xylulose 5-phosphate synthase catalyzes a novel random sequential mechanism. *Journal of Biological Chemistry*. 2011;286(42):36522-36531.
